# Supplementary material for: A comparison of medetomidine and its active enantiomer dexmedetomidine when administered with ketamine in mice
Source: PubMed Central journal article supplement (PMC3605306; doi:10.1186/1746-6148-9-48), 2013-03-13
Supplement: 1746-6148-9-48-S2.pdf [file 1746-6148-9-48-S2.pdf]

IP

SC

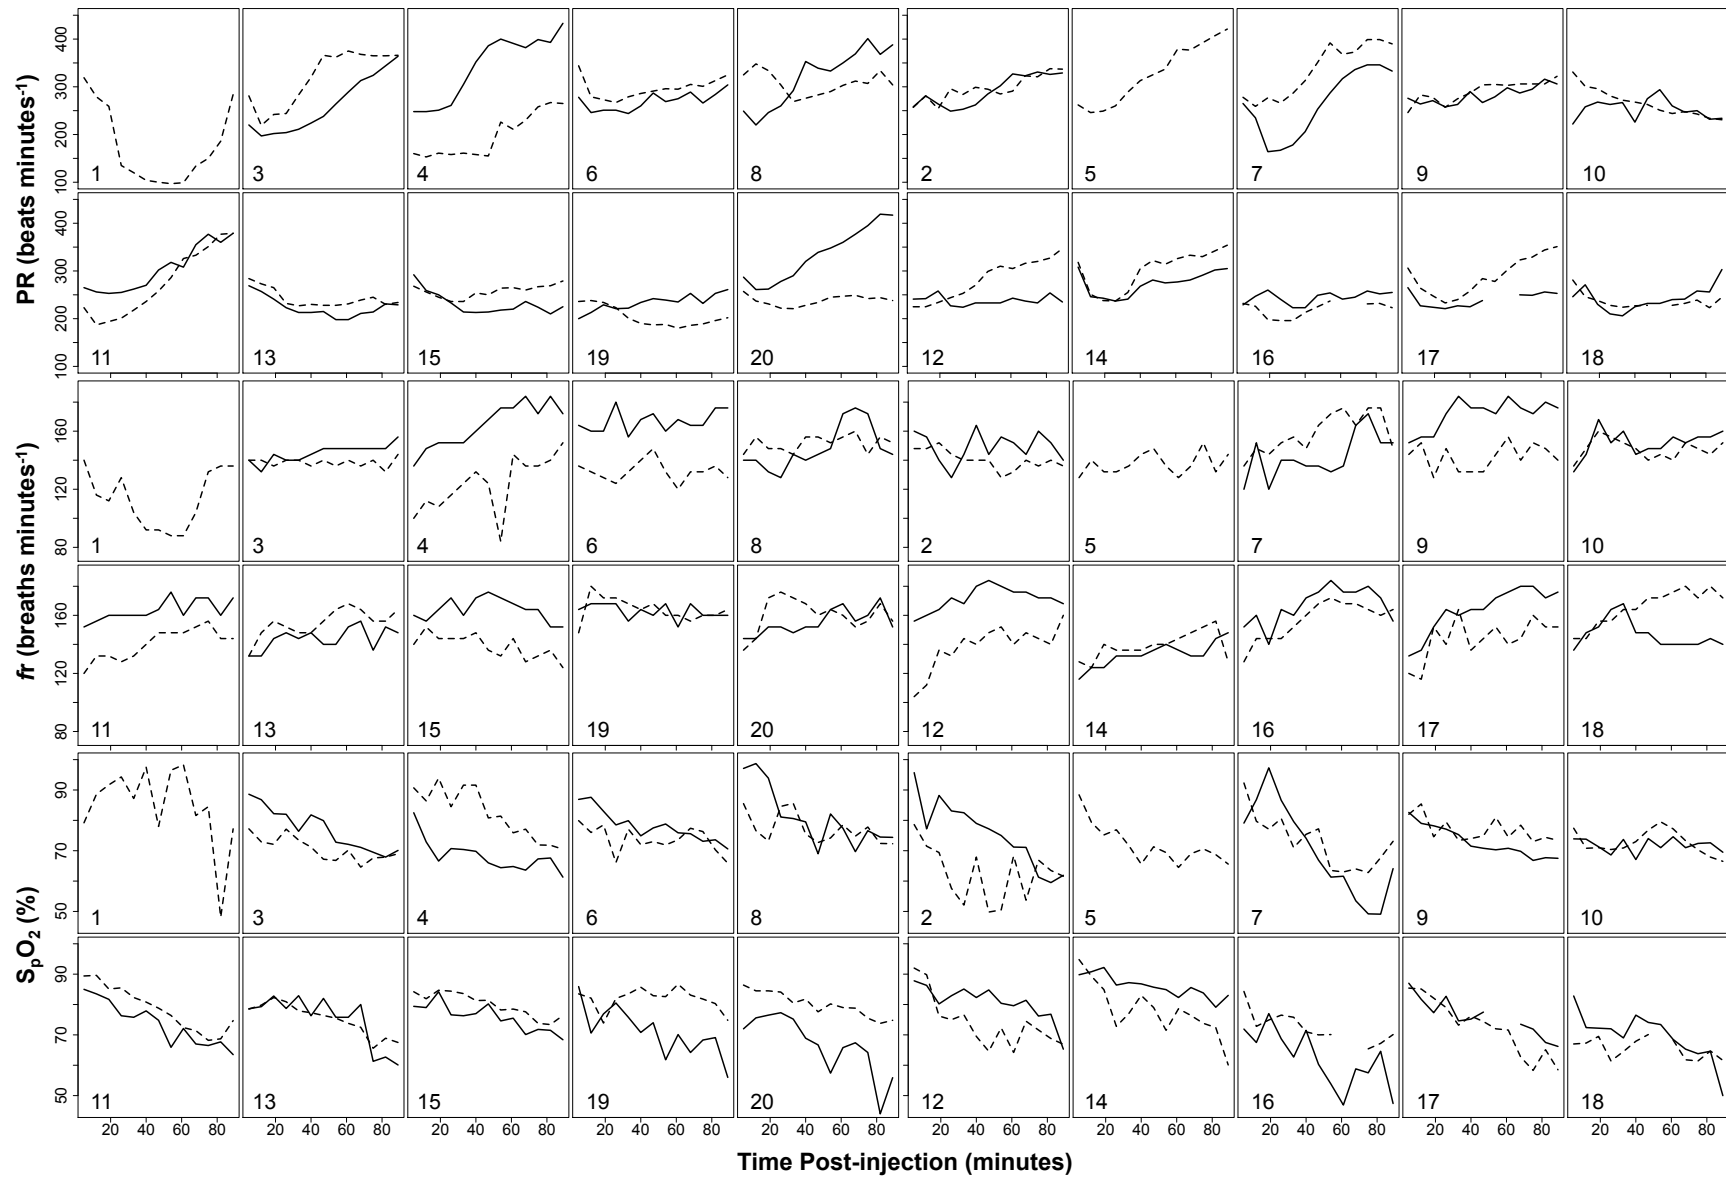

— MK    - - - DK
